# Supplementary material for: An inverse association between tea consumption and colorectal cancer risk
Source: PubMed Central journal article supplement (PMC5514915; doi:10.18632/oncotarget.16959), 2017-04-08
Supplement: oncotarget-08-37367-s001.pdf [file oncotarget-08-37367-s001.pdf]

# An inverse association between tea consumption and colorectal cancer risk

## Supplementary Materials

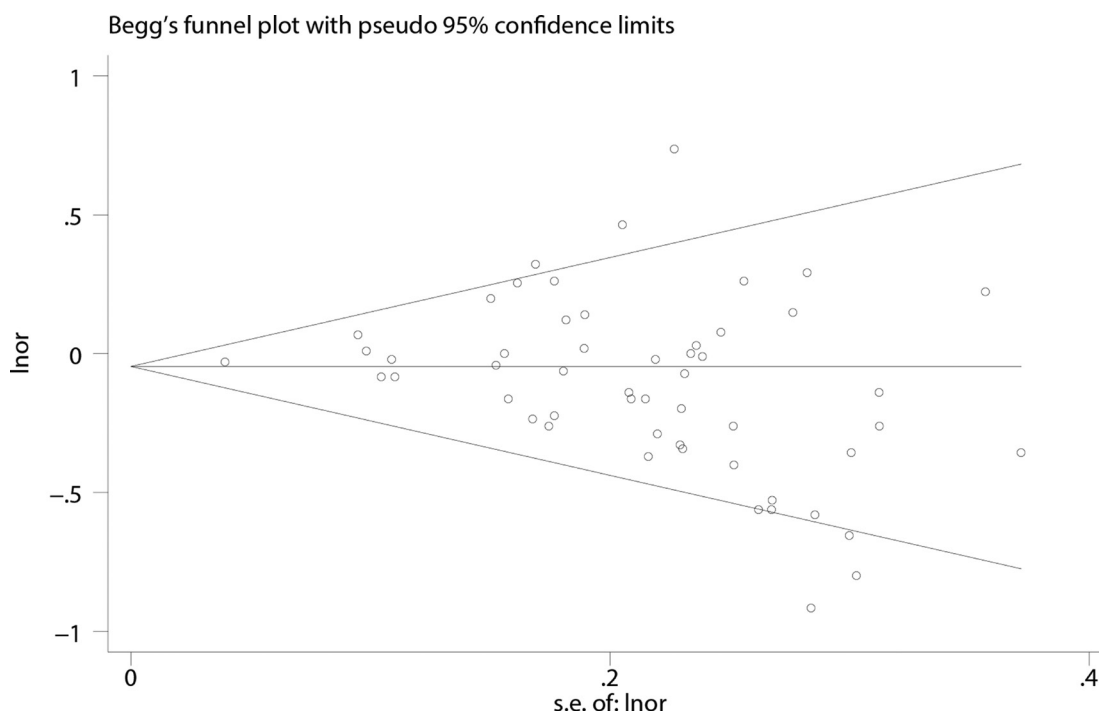

Supplementary Figure 1: Publication bias in the studies on highest vs. lowest level of tea consumption and colorectal cancer risk with Egger test.

Supplementary Table 1: Characteristics of cohort and case-control studies of tea consumption and colorectal cancer risk. See Supplementary\_Table\_1

## Supplementary Table 2: Methodological quality of cohort studies included in the meta-analysis

| Studies                | Representativeness of the exposed cohort | Selection of the nonexposed cohort | Ascertainment of exposure | Outcome of interest not present at start of study | Control for important factors <sup>a</sup> | Assessment of outcome | Follow-up period long enough for outcomes to occur <sup>b</sup> | Adequacy of follow-up evaluation of cohorts <sup>c</sup> | Total quality scores |
|------------------------|------------------------------------------|------------------------------------|---------------------------|---------------------------------------------------|--------------------------------------------|-----------------------|-----------------------------------------------------------------|----------------------------------------------------------|----------------------|
| Goldbohm et al. 1996   | ☆                                        | ☆                                  | ☆                         | ☆                                                 | ☆                                          | ☆                     | -                                                               | ☆                                                        | 7                    |
| Zheng et al. 1996      | ☆                                        | ☆                                  | ☆                         | ☆                                                 | -                                          | ☆                     | ☆                                                               | -                                                        | 6                    |
| Hartman et al. 1998    | ☆                                        | ☆                                  | ☆                         | ☆                                                 | -                                          | ☆                     | ☆                                                               | -                                                        | 6                    |
| Nagano et al. 2001     | ☆                                        | ☆                                  | ☆                         | ☆                                                 | -                                          | ☆                     | ☆                                                               | -                                                        | 6                    |
| Terry et al. 2001      | ☆                                        | ☆                                  | ☆                         | ☆                                                 | ☆                                          | ☆                     | ☆                                                               | ☆                                                        | 8                    |
| Su et al. 2002         | ☆                                        | ☆                                  | ☆                         | ☆                                                 | -                                          | ☆                     | ☆                                                               | ☆                                                        | 7                    |
| Michels et al. 2005    | ☆                                        | ☆                                  | ☆                         | ☆                                                 | -                                          | ☆                     | ☆                                                               | ☆                                                        | 7                    |
| Suzuki et al. 2005     | ☆                                        | ☆                                  | ☆                         | ☆                                                 | ☆                                          | ☆                     | ☆                                                               | ☆                                                        | 8                    |
| Oba et al. 2006        | ☆                                        | ☆                                  | ☆                         | ☆                                                 | ☆                                          | ☆                     | ☆                                                               | ☆                                                        | 8                    |
| Lee et al. 2007        | ☆                                        | ☆                                  | ☆                         | ☆                                                 | ☆                                          | ☆                     | ☆                                                               | -                                                        | 7                    |
| Sun et al. 2007        | ☆                                        | ☆                                  | ☆                         | ☆                                                 | ☆                                          | ☆                     | ☆                                                               | ☆                                                        | 8                    |
| Yang et al. 2007       | ☆                                        | ☆                                  | ☆                         | ☆                                                 | -                                          | ☆                     | -                                                               | ☆                                                        | 6                    |
| Simons et al. 2010     | ☆                                        | ☆                                  | ☆                         | ☆                                                 | -                                          | ☆                     | ☆                                                               | -                                                        | 6                    |
| Yang et al. 2011       | ☆                                        | ☆                                  | ☆                         | ☆                                                 | -                                          | ☆                     | -                                                               | -                                                        | 5                    |
| Nechuta et al. 2012    | ☆                                        | ☆                                  | ☆                         | ☆                                                 | -                                          | ☆                     | -                                                               | ☆                                                        | 6                    |
| Sinha et al. 2012      | ☆                                        | ☆                                  | ☆                         | ☆                                                 | -                                          | ☆                     | ☆                                                               | ☆                                                        | 7                    |
| Dominianni et al. 2013 | ☆                                        | ☆                                  | ☆                         | ☆                                                 | -                                          | ☆                     | ☆                                                               | -                                                        | 6                    |

<sup>a</sup>This part has 2 stars at most. Studies that adjusted for age or coffee consumption deserved 1 star respectively.

<sup>b</sup>None star means a cohort study did not provide follow-up years. 1 star means a follow-up year over 5 in a cohort study.

<sup>c</sup>None star means a cohort study with no clear follow-up rate. 1 star means a follow-up rate over 80% in a cohort study.

## Supplementary Table 3: Methodological quality of case-control studies included in the meta-analysis

| Study                | Adequate definition of cases | Representativeness of cases | Selection of controls | Definition of controls | Control for important factors <sup>a</sup> | Exposure ascertainment <sup>b</sup> | Same method of ascertainment for all subjects | Nonresponse rate <sup>c</sup> | Total quality rate |
|----------------------|------------------------------|-----------------------------|-----------------------|------------------------|--------------------------------------------|-------------------------------------|-----------------------------------------------|-------------------------------|--------------------|
| Baron et al. 1994    | ☆                            | ☆                           | ☆                     | ☆                      | ☆                                          | -                                   | ☆                                             | -                             | 6                  |
| Ji et al. 1997       | ☆                            | ☆                           | ☆                     | ☆                      | ☆                                          | -                                   | ☆                                             | -                             | 6                  |
| Munoz et al. 1998    | ☆                            | ☆                           | ☆                     | ☆                      | ☆                                          | -                                   | ☆                                             | ☆                             | 7                  |
| Tajima et al. 1998   | ☆                            | ☆                           | ☆                     | -                      | ☆                                          | -                                   | ☆                                             | -                             | 5                  |
| Slattery et al. 1999 | ☆                            | ☆                           | ☆                     | -                      | ☆                                          | -                                   | ☆                                             | -                             | 5                  |
| Cerhan et al. 2011   | ☆                            | ☆                           | ☆                     | ☆                      | ☆☆                                         | -                                   | ☆                                             | ☆                             | 8                  |
| Iiyasova et al. 2002 | ☆                            | ☆                           | ☆                     | -                      | ☆                                          | -                                   | ☆                                             | -                             | 5                  |
| Woolcott et al. 2002 | ☆                            | ☆                           | ☆                     | ☆                      | ☆                                          | -                                   | ☆                                             | ☆                             | 7                  |
| Iiyasova et al. 2003 | ☆                            | ☆                           | ☆                     | ☆                      | ☆                                          | -                                   | ☆                                             | ☆                             | 7                  |
| Li et al. 2011       | ☆                            | ☆                           | ☆                     | ☆                      | ☆                                          | -                                   | ☆                                             | ☆                             | 7                  |
| Wang et al. 2013     | ☆                            | ☆                           | ☆                     | ☆                      | ☆                                          | ☆                                   | ☆                                             | ☆                             | 8                  |
| Green et al. 2013    | ☆                            | ☆                           | ☆                     | ☆                      | ☆                                          | ☆                                   | ☆                                             | ☆                             | 8                  |

<sup>a</sup>This part has 2 stars at most. Studies that adjusted for age or coffee consumption deserved 1 star respectively.

<sup>b</sup>2 stars could be given for this part at most. If studies did not provide the evidence about double-blind between case and control status or consideration about tea consumption changes because of disease, none star will be awarded.

<sup>c</sup>One star means that there was no significant difference in the response rate between case and control status by using the chi-square test ( $P > 0.05$ )

**Supplementary Table 4: Meta-regression analysis**

| <b>Variable</b> | <b>Coefficient</b> | <b>Standard error</b> | <b><i>P</i> value</b> | <b>95% CI</b> |          |
|-----------------|--------------------|-----------------------|-----------------------|---------------|----------|
| Publish year    | -.0083075          | .104799               | 0.937                 | -.2226454     | .2060304 |
| Region          | .0644497           | .043658               | 0.151                 | -.0248409     | .1537403 |
| Design          | .0229578           | .0538925              | 0.673                 | -.0872648     | .1331804 |
| Sex             | -.0774416          | .0799168              | 0.341                 | -.2408898     | .0860066 |
| Source          | -.0825571          | .1201193              | 0.497                 | -.3282287     | .1631144 |
